# Supplementary material for: Metagenomic next-generation sequencing assistance in identifying non-tuberculous mycobacterial infections
Source: PubMed Central journal article supplement (PMC10500063; doi:10.3389/fcimb.2023.1253020), 2023-08-31

## Kouwanshun

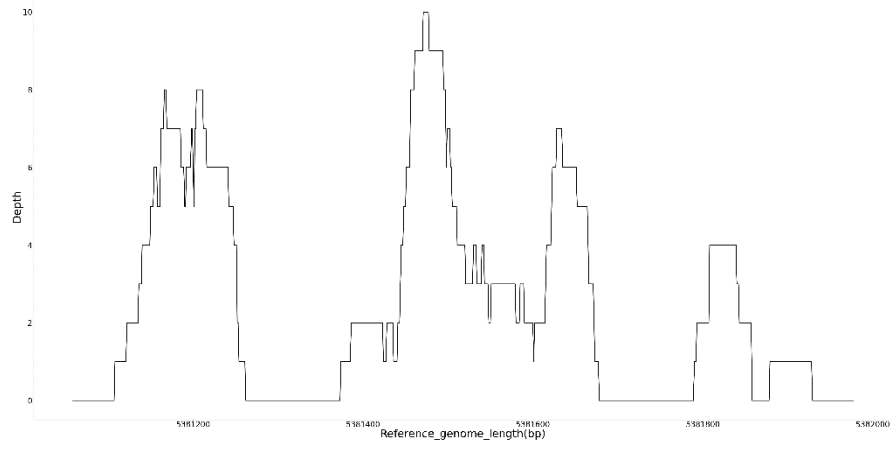

## Zhangbaoping

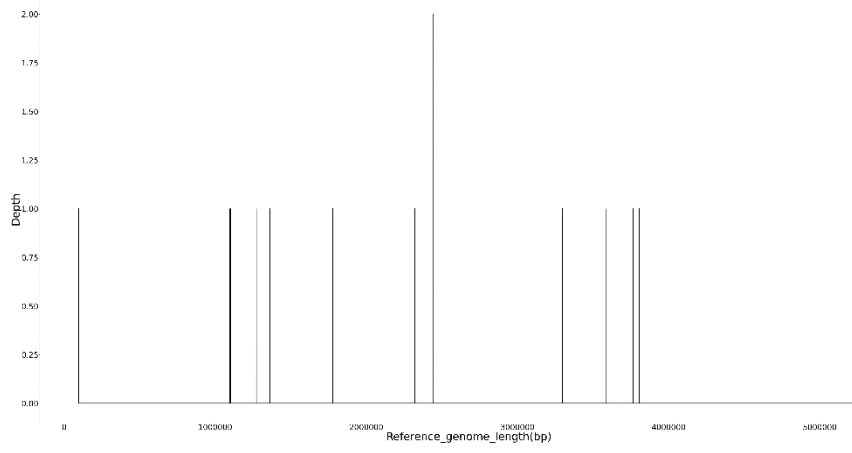

## Yangwenfa

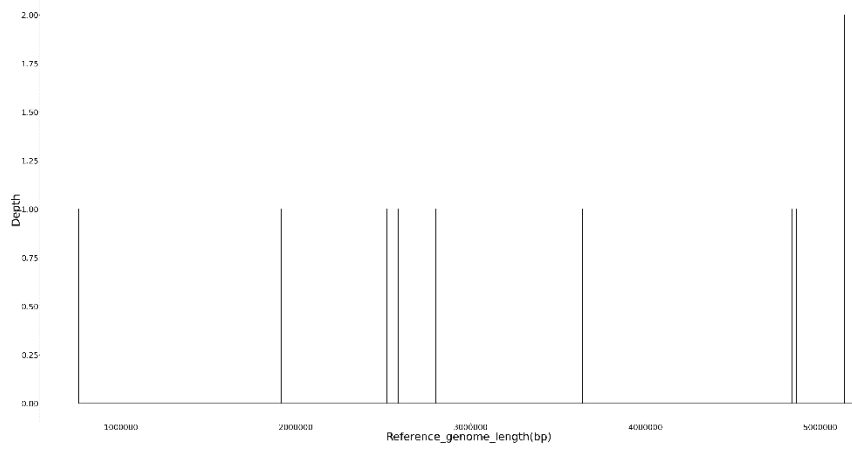

## Wangkui

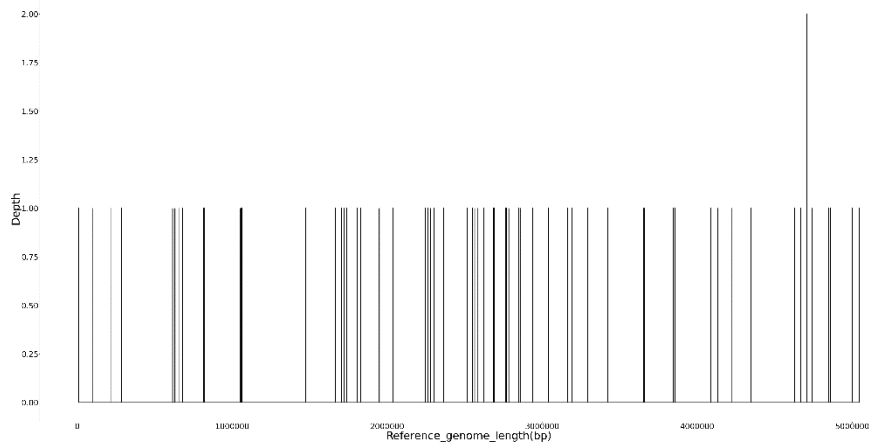

## Bihexiang

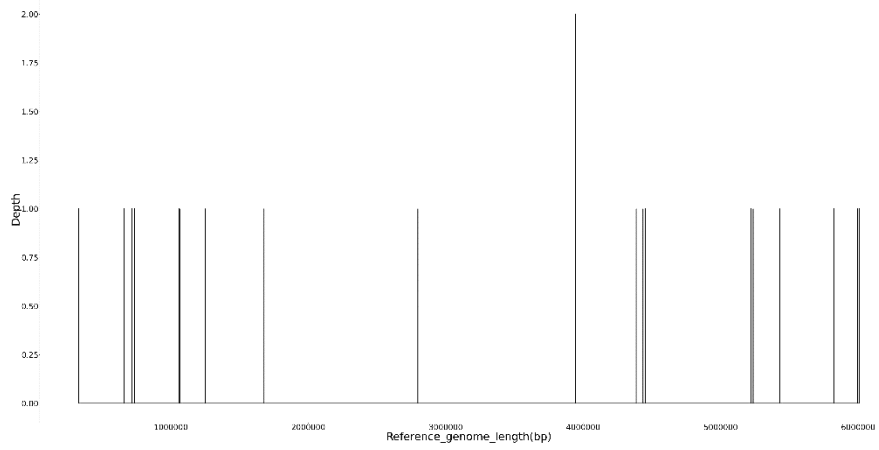

## Jiafurong

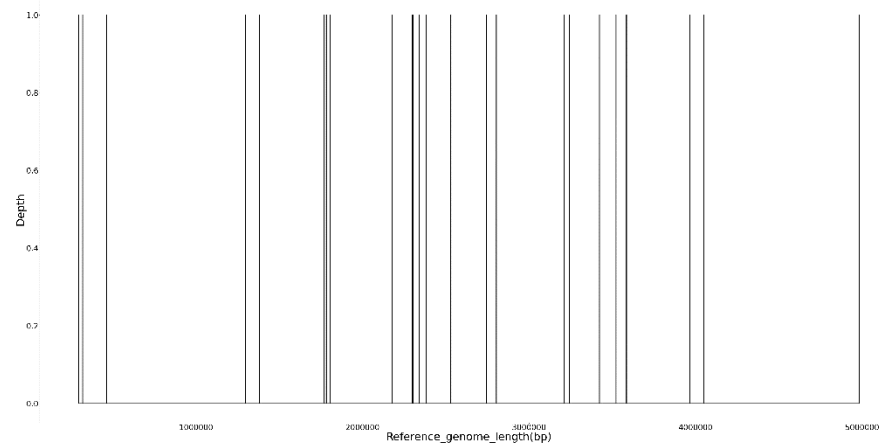

## Jingzhohua

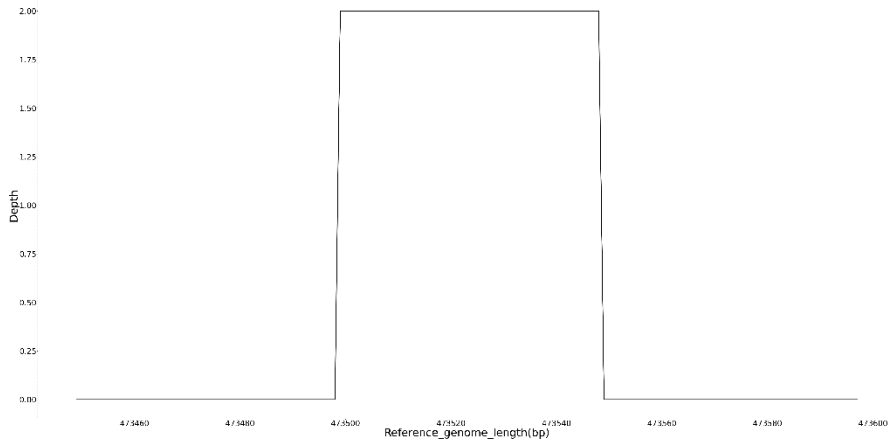

## Lisuzhi

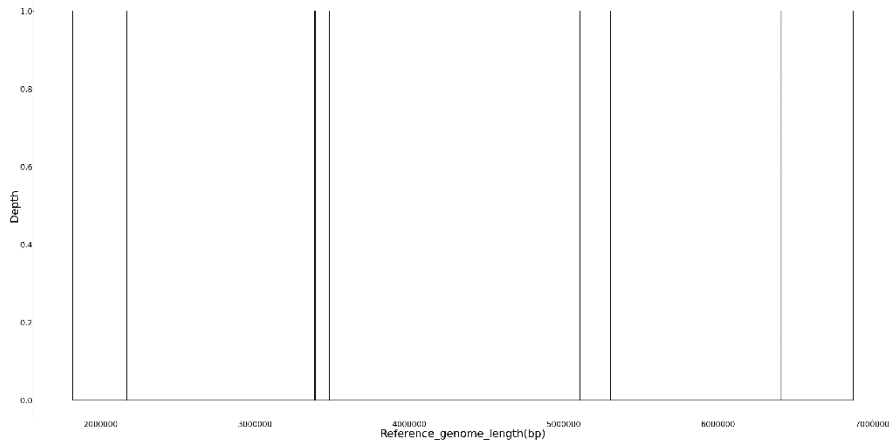

## Liucunying

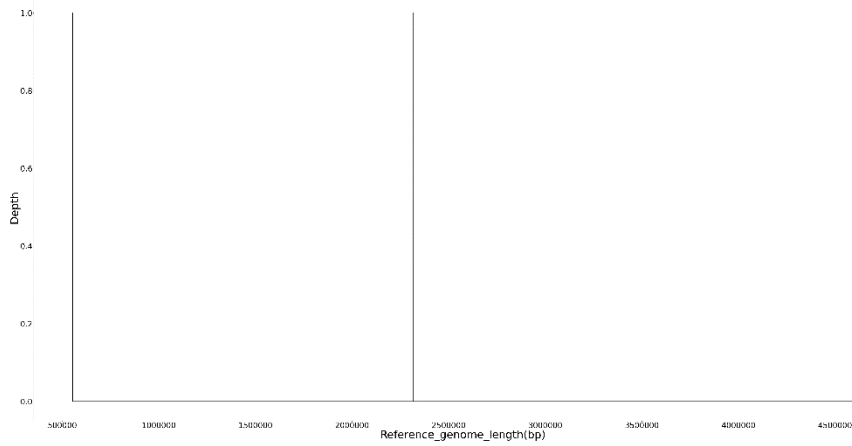

## Lihuziwe

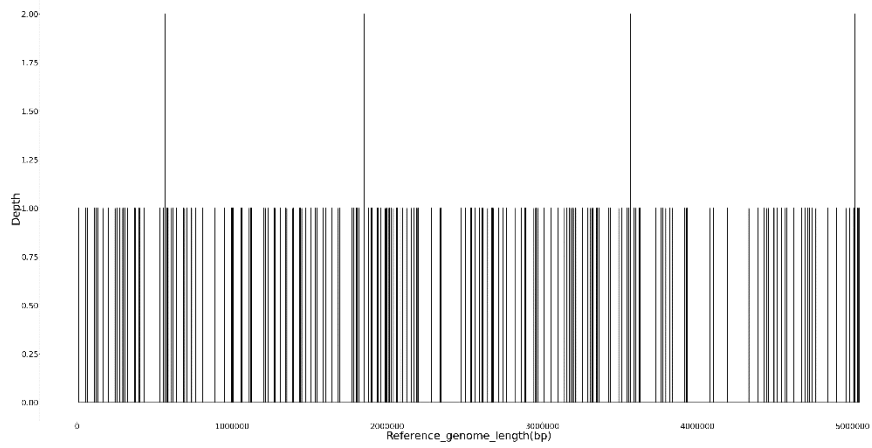

## Shangzhence

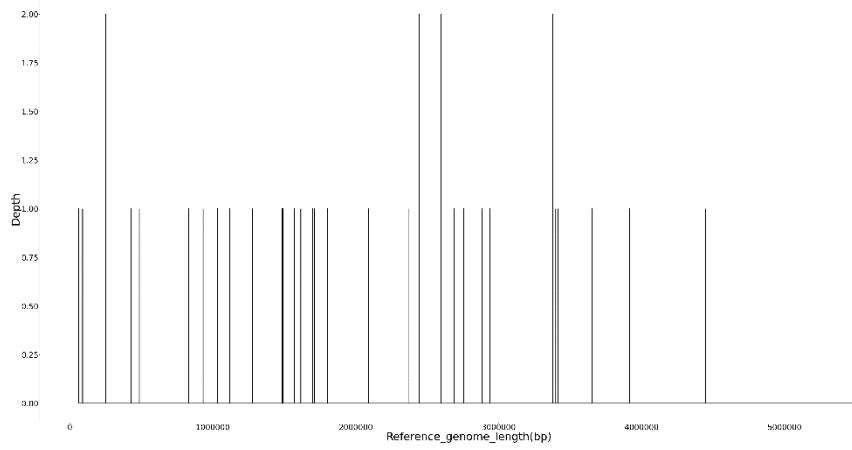

## Shenghengying

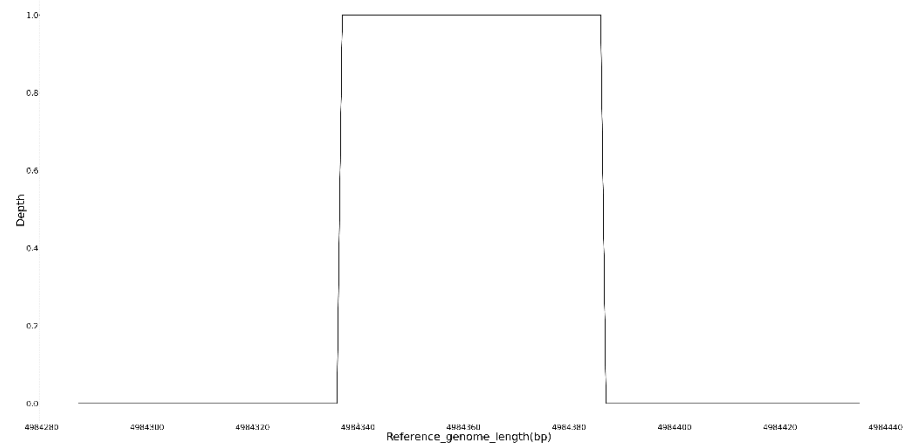

## Wangjinming

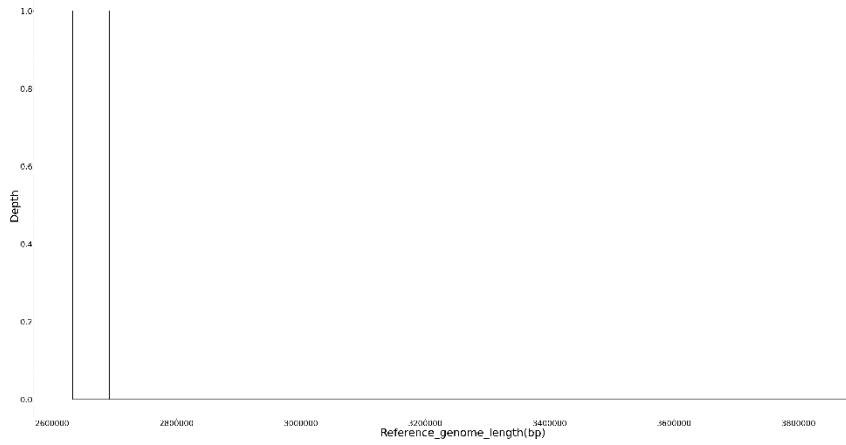

## Weiyaxia

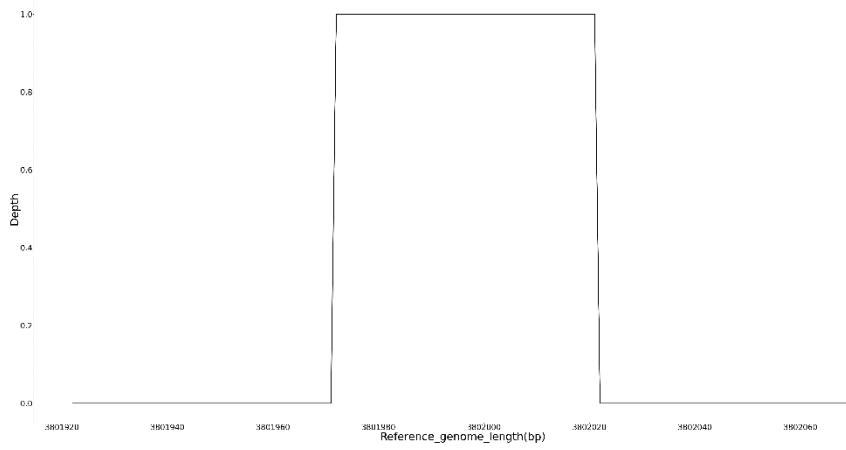

## Yinxiaolin

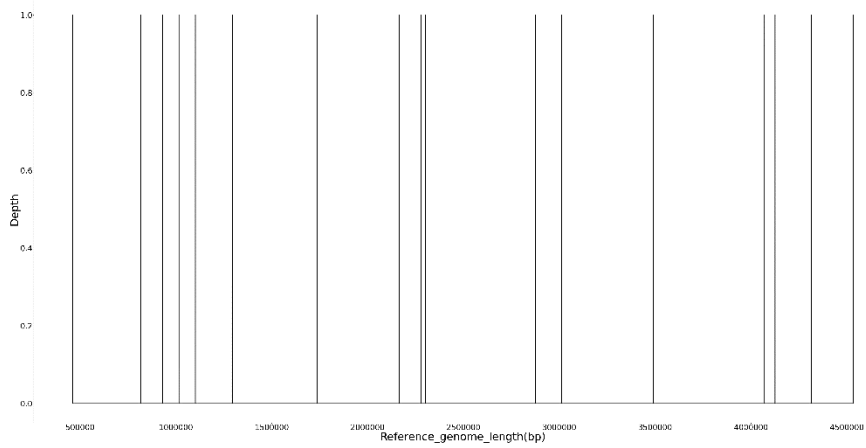

## Zhanghaichen

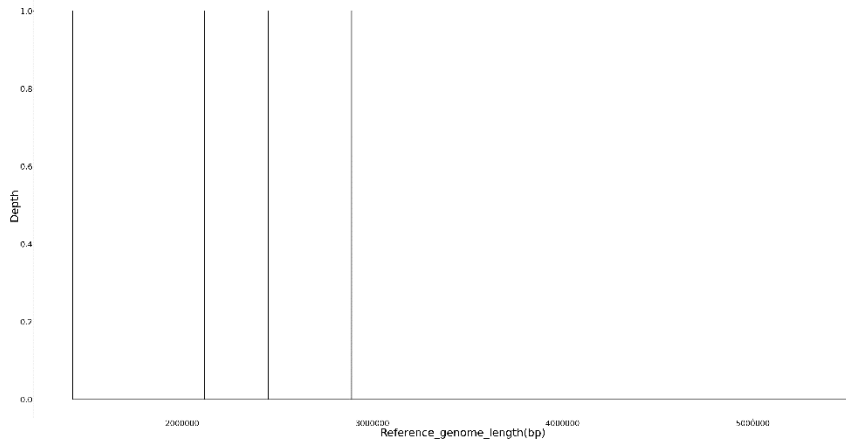

## Zhanghailan

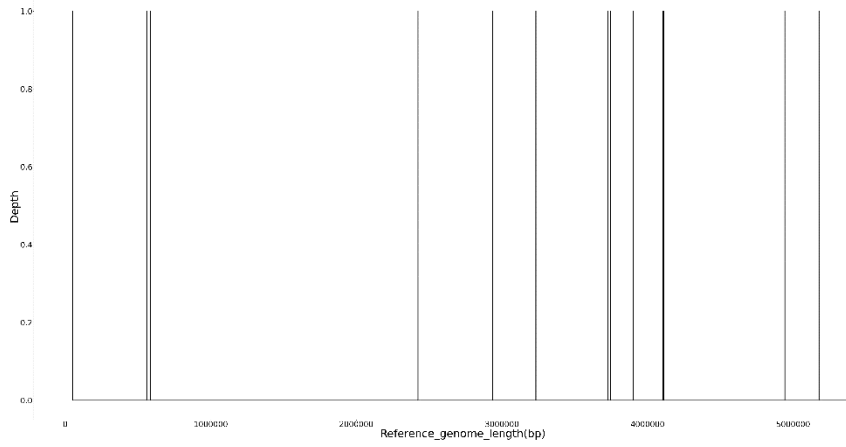

## Zhangjie

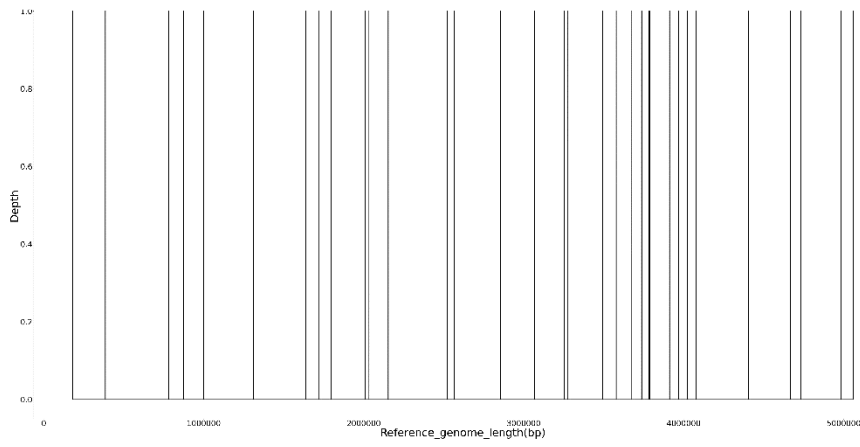

## Zhangjiefang

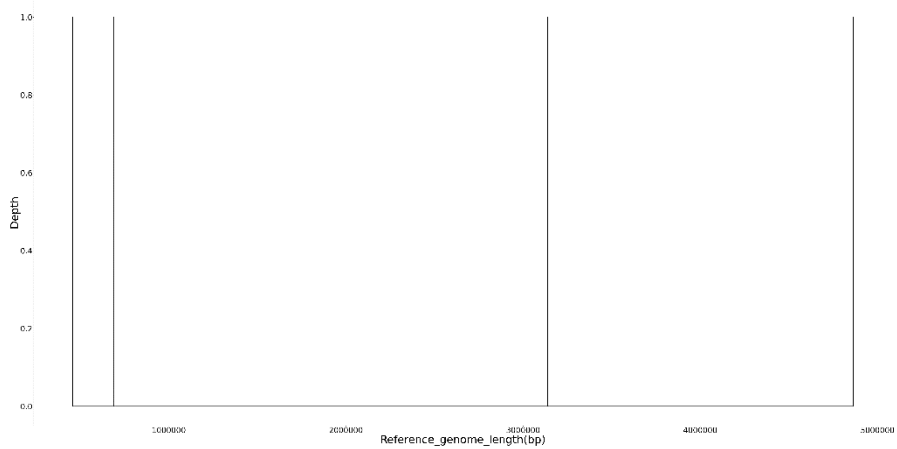

## Zhangmaofan

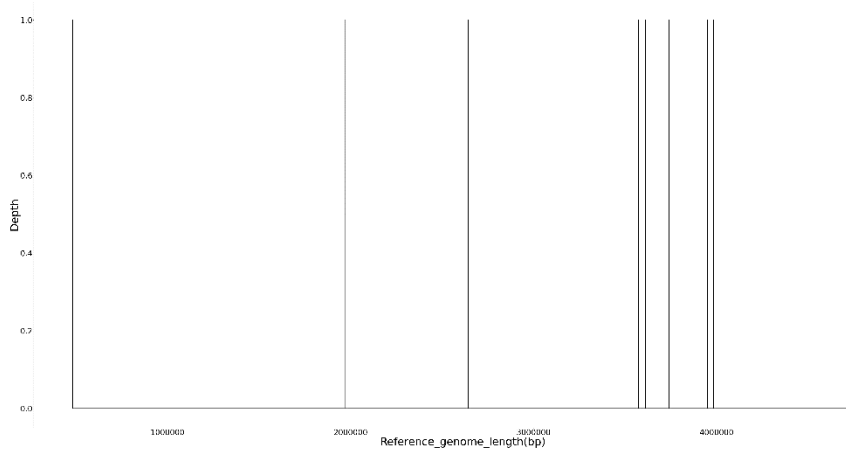

## Zhangshifeng

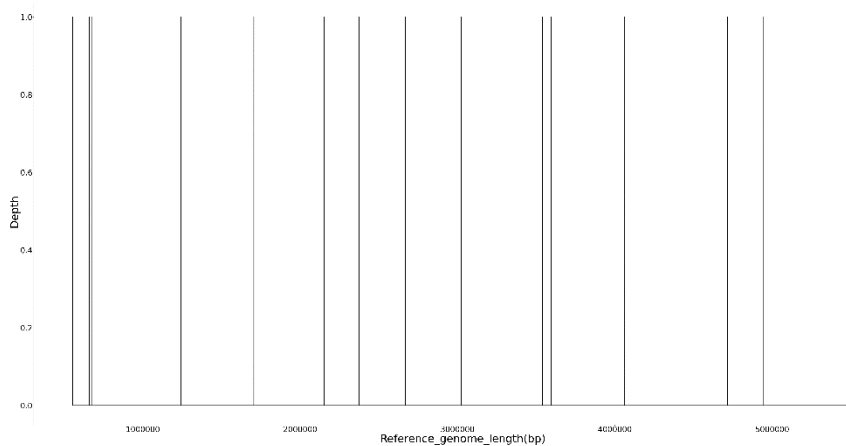

## Zhangyana

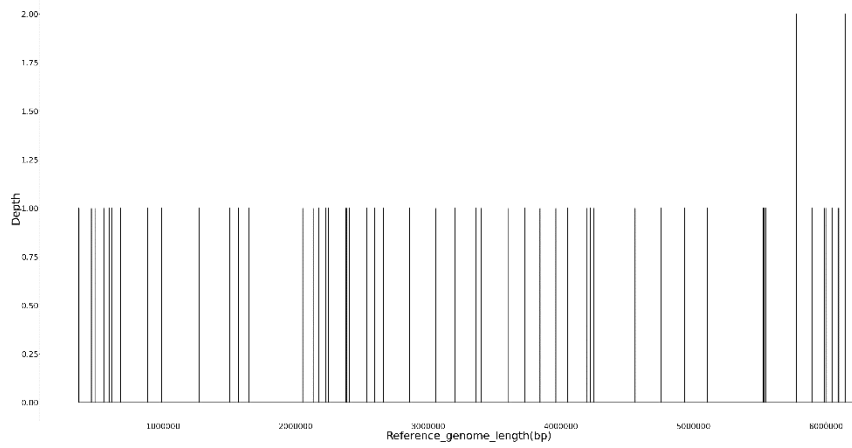

## Zhaojianzhong

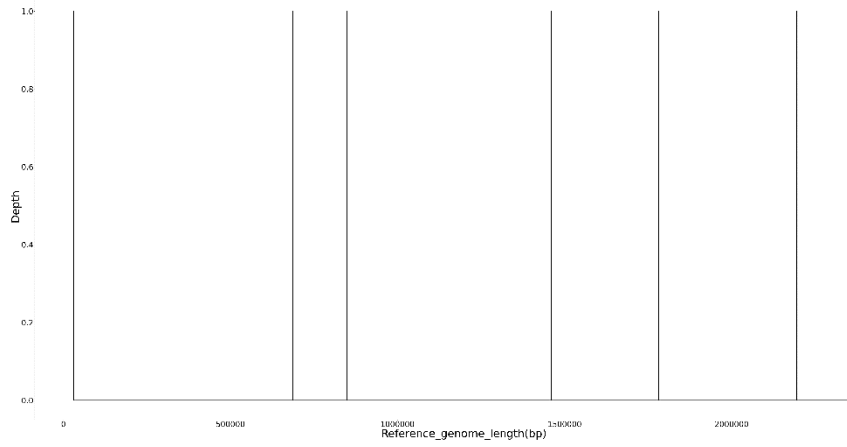

## Zhoudui

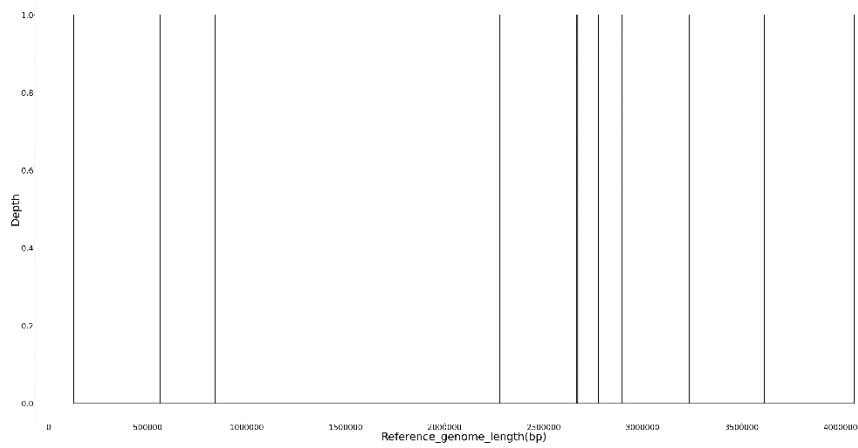

Supplement: DataSheet_1.pdf [file DataSheet_1.pdf]
